# Supplementary figures and images for: The Role and Mechanism of Periostin in the Formation of Breast Prosthesis Capsule
Source: Research Square preprint supplement (doi:10.21203/rs.3.rs-4547511/v1), 2024-06-26

Figure 3A

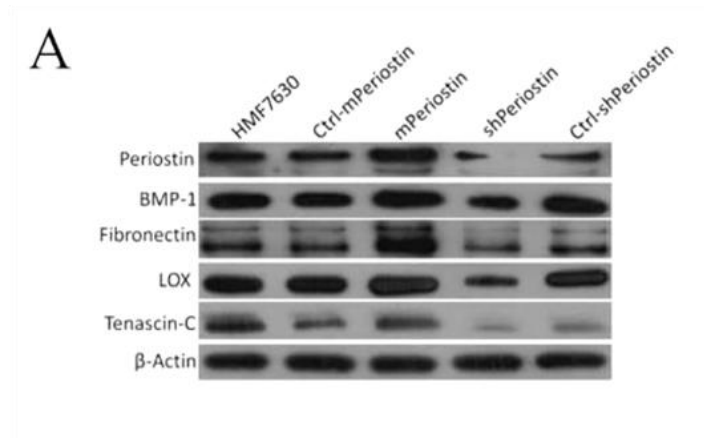

Periostin

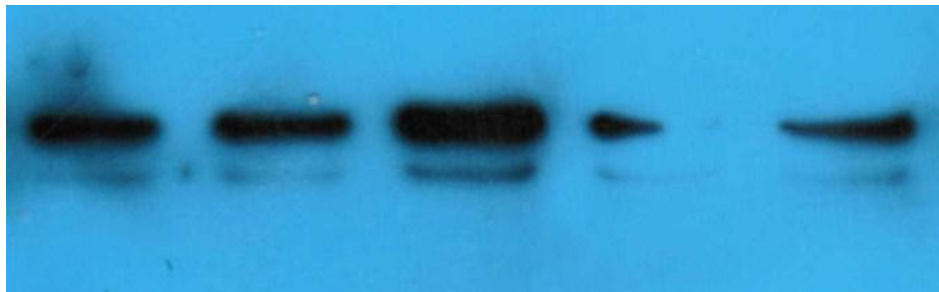

BMP-1

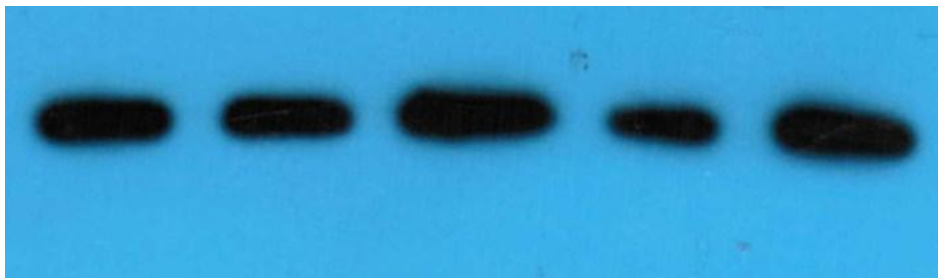

Fibronectin

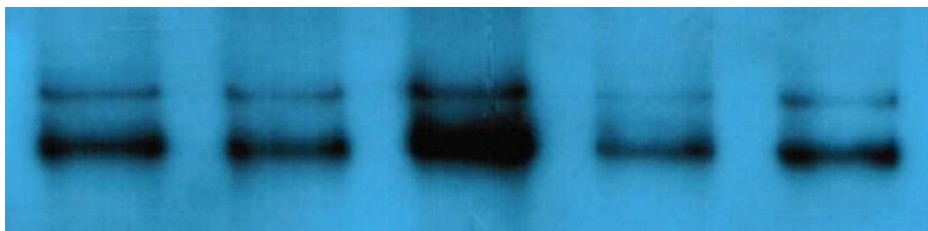

LOX

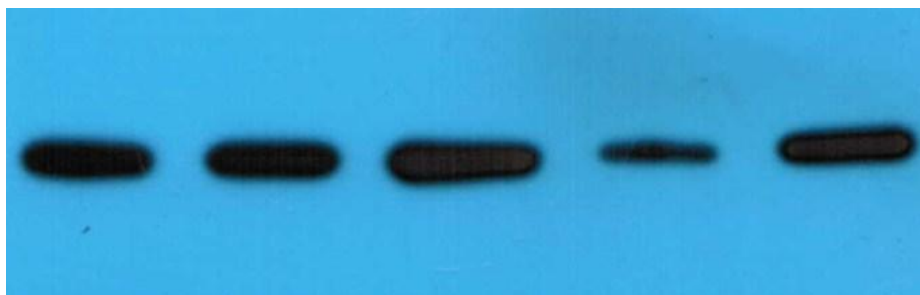

Tenascin-C

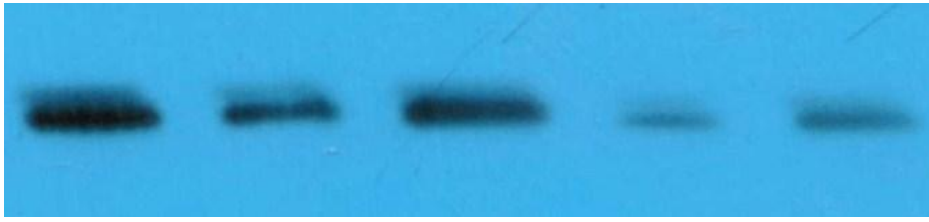

$\beta$ -Actin

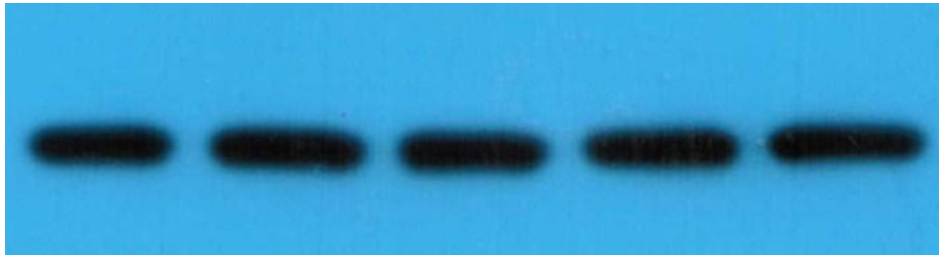

Supplement: Supplementary file 1 [file 417156c852ade33f1ff46d36.pdf]

Figure 2D

**D**

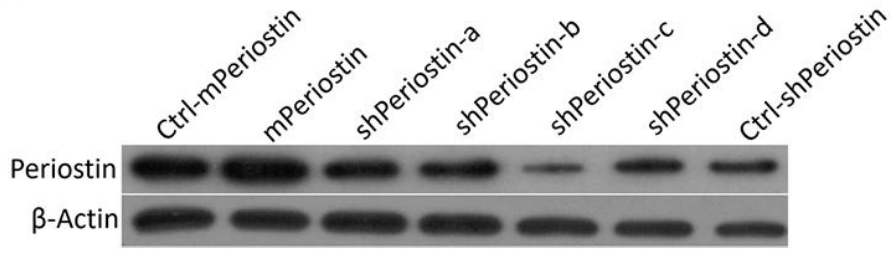

Periostin

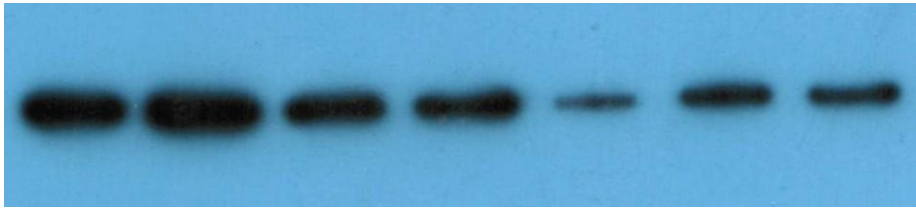

$\beta$ -actin

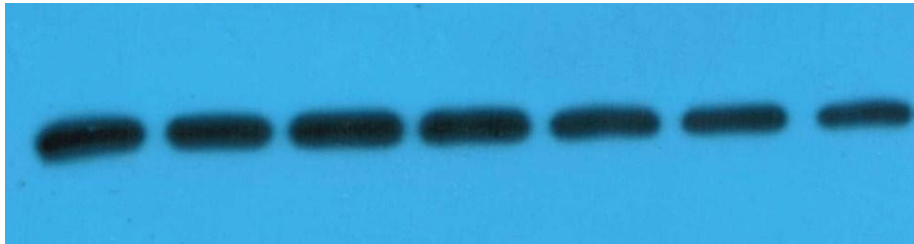

Figure 2F

**F**

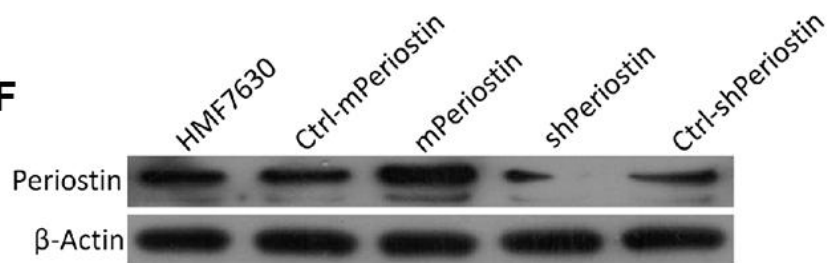

Periostin

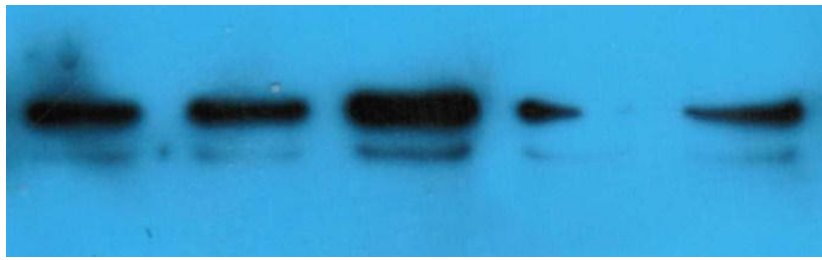

$\beta$ -actin

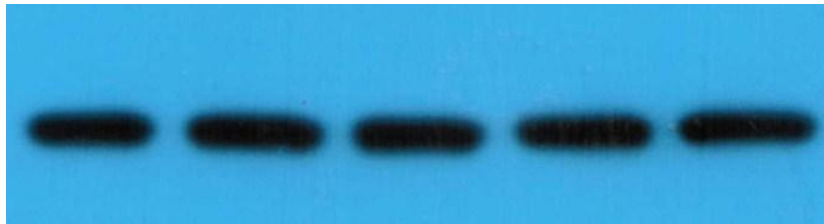

Supplement: Supplementary file 2 [file 5c7e4b5411faeca54d9b9f5a.pdf]

Figure 5B

B

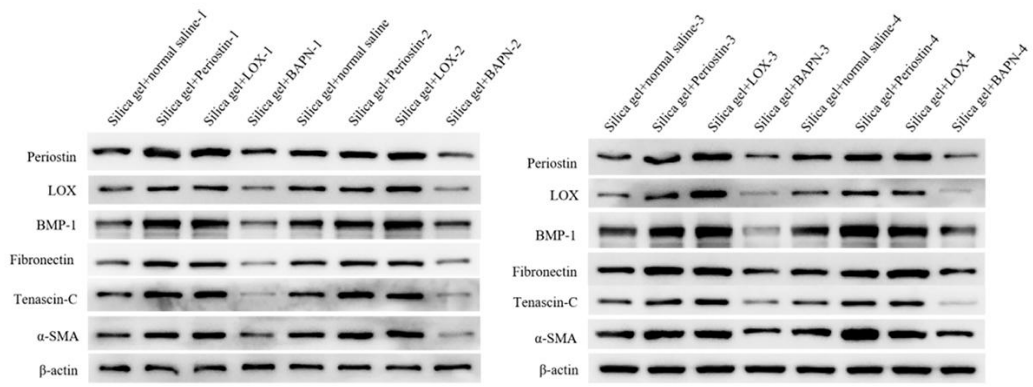

Periostin

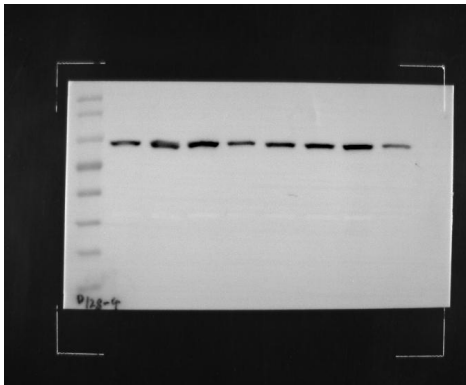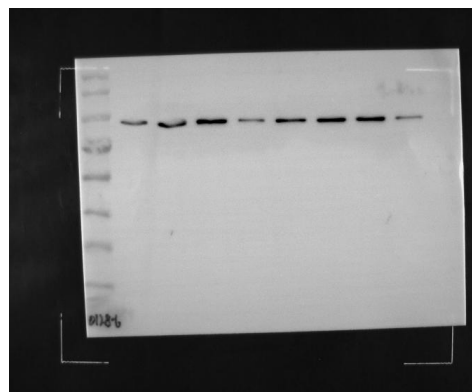

LOX

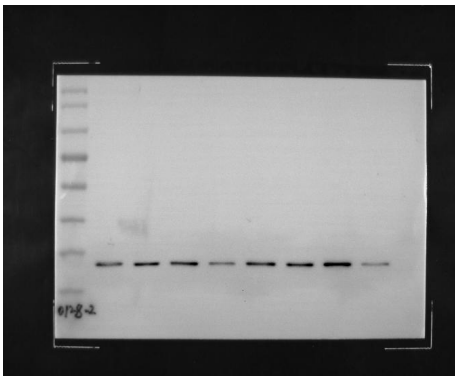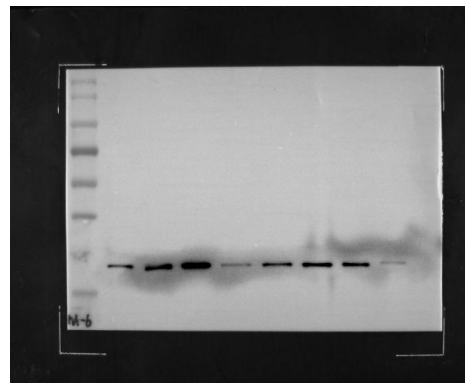

BMP1

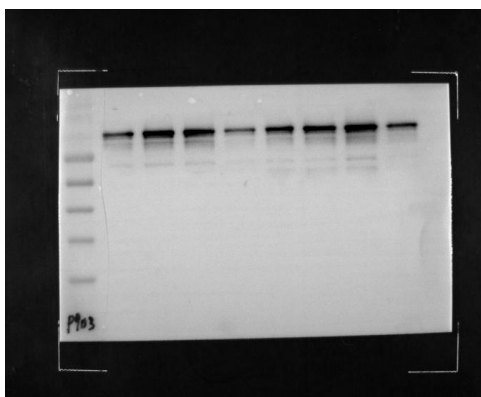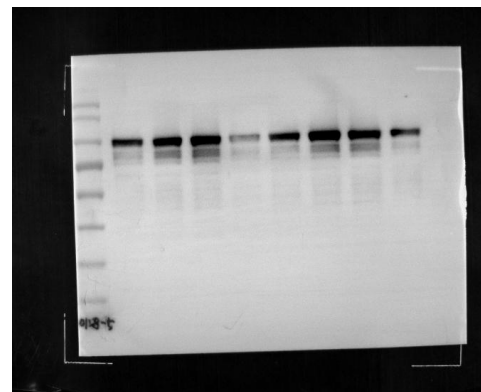

Fibronectin

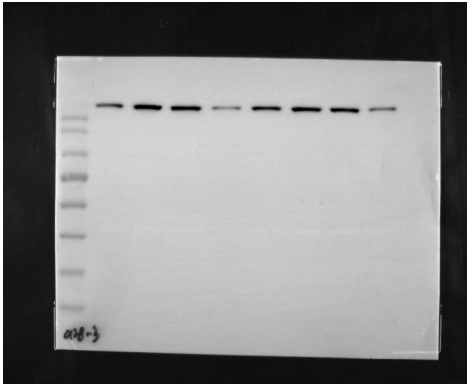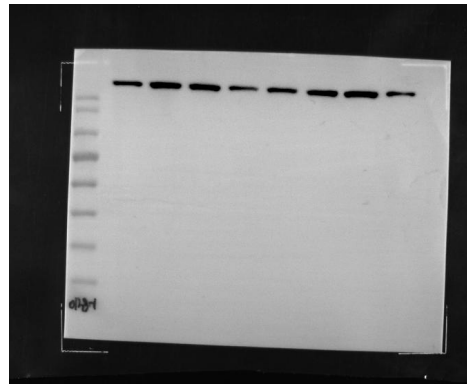

Tenascin C

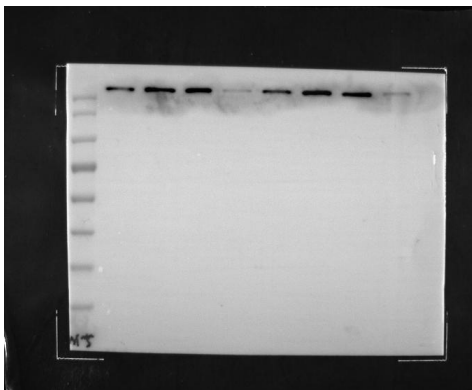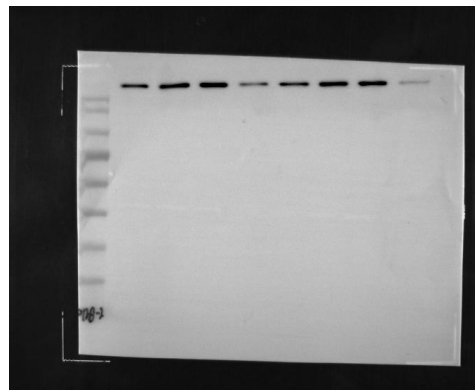

α-SMA

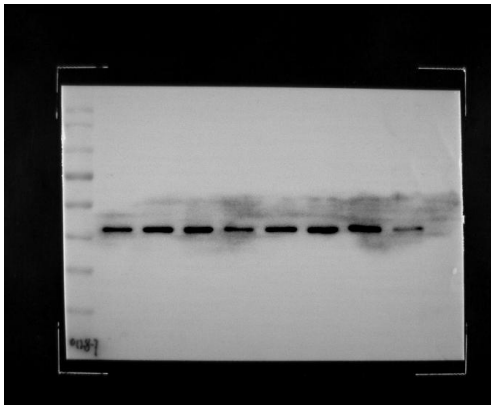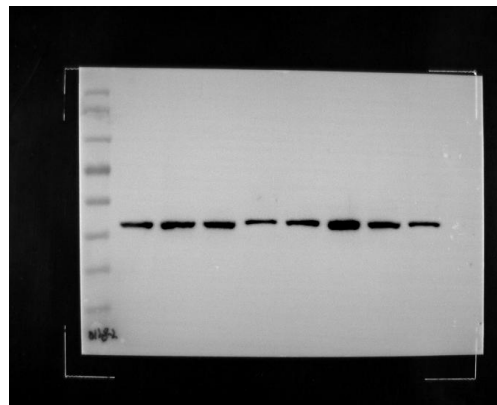

β-actin

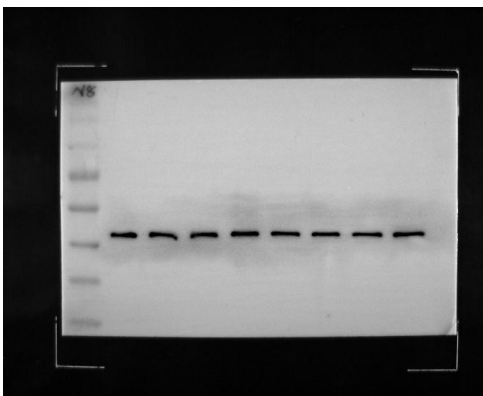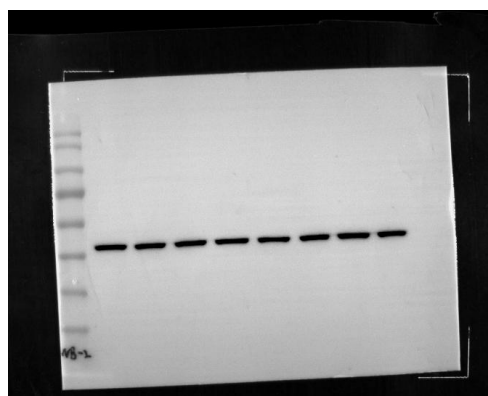

Supplement: Supplementary file 3 [file 8756fd7a7f35ef27f67db8d9.pdf]
